# Supplementary material
Source: HighWire-hosted journal article supplement (https://msphere.asm.org/content/2/2/e00385-16)
Supplement: inline-supplementary-material-4 [file inline-supplementary-material-4.pdf]

| Name                           | Primers | Sequence (5' -> 3')                                                                                                                                                                                                                                                                                                                                                                                                                                                                                                                                                                                                                                                                                                                                                                                                                                                                                                                                                                                                                                                                                                                                                                                                                                                                                                                                                                                                                                                                                                                                                                                                                                                                                                                                                                                                                                                                                                                                                                                                                                                                                                                                                                                                                                                                                                                                                                                                                                                                                                                                                                                                                                                                                                                                                                                            | Key Features                                                                                                                         | Key Restriction Sites                                |
|--------------------------------|---------|----------------------------------------------------------------------------------------------------------------------------------------------------------------------------------------------------------------------------------------------------------------------------------------------------------------------------------------------------------------------------------------------------------------------------------------------------------------------------------------------------------------------------------------------------------------------------------------------------------------------------------------------------------------------------------------------------------------------------------------------------------------------------------------------------------------------------------------------------------------------------------------------------------------------------------------------------------------------------------------------------------------------------------------------------------------------------------------------------------------------------------------------------------------------------------------------------------------------------------------------------------------------------------------------------------------------------------------------------------------------------------------------------------------------------------------------------------------------------------------------------------------------------------------------------------------------------------------------------------------------------------------------------------------------------------------------------------------------------------------------------------------------------------------------------------------------------------------------------------------------------------------------------------------------------------------------------------------------------------------------------------------------------------------------------------------------------------------------------------------------------------------------------------------------------------------------------------------------------------------------------------------------------------------------------------------------------------------------------------------------------------------------------------------------------------------------------------------------------------------------------------------------------------------------------------------------------------------------------------------------------------------------------------------------------------------------------------------------------------------------------------------------------------------------------------------|--------------------------------------------------------------------------------------------------------------------------------------|------------------------------------------------------|
| gRFP-2                         |         | GGTGAAGGTAGACCATATGA                                                                                                                                                                                                                                                                                                                                                                                                                                                                                                                                                                                                                                                                                                                                                                                                                                                                                                                                                                                                                                                                                                                                                                                                                                                                                                                                                                                                                                                                                                                                                                                                                                                                                                                                                                                                                                                                                                                                                                                                                                                                                                                                                                                                                                                                                                                                                                                                                                                                                                                                                                                                                                                                                                                                                                                           | RFP guide RNA                                                                                                                        |                                                      |
| gLEU2-1                        |         | TGGCAGCACCACCAATCAAG                                                                                                                                                                                                                                                                                                                                                                                                                                                                                                                                                                                                                                                                                                                                                                                                                                                                                                                                                                                                                                                                                                                                                                                                                                                                                                                                                                                                                                                                                                                                                                                                                                                                                                                                                                                                                                                                                                                                                                                                                                                                                                                                                                                                                                                                                                                                                                                                                                                                                                                                                                                                                                                                                                                                                                                           | LEU2 gRNA                                                                                                                            |                                                      |
| P <sub>ADH</sub> HHgRFP<br>HDV |         | <p> <span style="color: red;">GTCGACATGTCAAAGGATTCAACGGTTGAGATGGAGCCGT</span><br/> <span style="color: red;">CAAATATCCAAAACACTCTTCTTTCAACTAATTTGCCGTAAA</span><br/> <span style="color: red;">CTATCTCCATCGTACGATTAAGATAAAAAAAAAACAATTATTT</span><br/> <span style="color: red;">CTTACAATATTTGATAGAGACCCAATGCAAAGCCAGCGAG</span><br/> <span style="color: red;">AAAGAGGAGTATTGGCATTGTTGGGTAGTAGATGAATGAG</span><br/> <span style="color: red;">TAATCTTCTAGCCAAAACAAAATAAACCAACAAGAACAGTAG</span><br/> <span style="color: red;">GCAAACTGAGTACTTGATAGCGCTTGTAGTCTTTGTATTT</span><br/> <span style="color: red;">AAAAAACCTAATTGTCCAAAATTGAAAATCATGAGTTGC</span><br/> <span style="color: red;">AAATTTGTTGAAATCACCAGGTAATAGATCATTTAGCTATA</span><br/> <span style="color: red;">TCGCCTTATCATTCTTCGTACAAGAATTATACACAAATACC</span><br/> <span style="color: red;">ACCACCACACCACCAGAAATTTTACACGTGTTTTCTAAAT</span><br/> <span style="color: red;">TATTACTTTCCGTGGCCAATCAAATTGAAATTTTCTTGTTT</span><br/> <span style="color: red;">GAAACGGCAGTGCCTCAAACATTATAGTAGCAAGTATTGC</span><br/> <span style="color: red;">CTAAAGAGTTTCCGTCTCGTGCCCCCCCCCTATCCCCTTTT</span><br/> <span style="color: red;">GTAATTTGCCAAAATAGCTCAAAAAGGATAATCCCAGCACTT</span><br/> <span style="color: red;">TTTTTTTCCGAGTTCTCGTCATGCAAGCAAGCTTATTCAGA</span><br/> <span style="color: red;">ATTTTCAGAGGTGCGAGTCTCACCCTACCCTGCAGCTG</span><br/> <span style="color: red;">CATCTTTTACAGCAACAGCAACAGCAGGTGCCACCACGGC</span><br/> <span style="color: red;">AAAGACATTGTCTGGATCCACTGTGCTCCGAAAACGTATA</span><br/> <span style="color: red;">AAAGGACCTATTCATCCCTGGTCTTATCTTCTCCAGAATTA</span><br/> <span style="color: red;">TTTTTTTTTTCATCAGTTTAAACAACAACAACGTTATTGTCAT</span><br/> <span style="color: red;">ACAACAACAACAACAATAACAAAACAATT</span><span style="color: green;">agatc</span><span style="color: green;">TTTACC</span><span style="color: green;">Cct</span><br/> <span style="color: blue;">gatgagtc</span><span style="color: blue;">ccgtgaggac</span><span style="color: blue;">gaaacgagta</span><span style="color: blue;">agctcgtc</span><span style="color: blue;">GGTGAAGGTAGACCA</span><br/> <span style="color: purple;">TATGA</span><span style="color: purple;">gttttagagctagaaatagc</span><span style="color: purple;">Aag</span><span style="color: purple;">ttaaataaggctag</span><span style="color: purple;">tccgttatcaactg</span><br/> <span style="color: purple;">aaaagtgg</span><span style="color: purple;">caccgagtcggtgctttt</span><span style="color: purple;">GCCGGC</span><span style="color: purple;">ATGGTCCCAGCCTC</span><br/> <span style="color: orange;">CTCGCTGGCGCCGGCTGGGCAACATGCTTCGGCATGGCG</span><br/> <span style="color: orange;">AATGGGAC</span><span style="color: orange;">acgctg</span> </p> | <p> Red: <i>ADH1</i> Promoter;<br/> Green: Hammer-head;<br/> Blue: 20bp gRFP; Purple:<br/> Cas9 binding Motif;<br/> Orange: HDV </p> | <p> <i>Sall</i>, <i>BglII</i>,<br/> <i>MluI</i> </p> |

|                                      |  |                                                                                                                                                                                                                                                                                                                                                                                                                                                                                                                                                                                                                                                                                                                                                                                                                                                                                                                                                                                                                                                                                                                                                                                                                                                                                                                                                                |                                                                                                                                           |                                                   |
|--------------------------------------|--|----------------------------------------------------------------------------------------------------------------------------------------------------------------------------------------------------------------------------------------------------------------------------------------------------------------------------------------------------------------------------------------------------------------------------------------------------------------------------------------------------------------------------------------------------------------------------------------------------------------------------------------------------------------------------------------------------------------------------------------------------------------------------------------------------------------------------------------------------------------------------------------------------------------------------------------------------------------------------------------------------------------------------------------------------------------------------------------------------------------------------------------------------------------------------------------------------------------------------------------------------------------------------------------------------------------------------------------------------------------|-------------------------------------------------------------------------------------------------------------------------------------------|---------------------------------------------------|
| <p>P<sub>ADHt</sub>AgRFP<br/>HDV</p> |  | <p>GTCGACATGTCAAAGGATTCAACGGTTGAGATGGAGCCGT<br/> CAAATATCCAAAACACTCTTCTTTCAACTAATTTGCCGTA<br/> CTATCTCCATCGTACGATTAAGATAAAAAAAAAACAATTTT<br/> CTTACAATATTTGATAGAGACCCAATGCAAAGCCAGCGAG<br/> AAAGAGGAGTATTGGCATTGTTGGGTAGTAGATGAATGAG<br/> TAATCTTCTAGCCAAAACAAAATAAACCAACAAGAACAGTAG<br/> GCAAAACTGAGTACTTGATAGCGCTTGTAGTCTTTGTATTT<br/> AAAAAACCTAATTGTCCAAAAATTGAAAATCATGAGTTGC<br/> AAATTTGTTGAAATCACCAGGTAATAGATCATTAGCTATA<br/> TCGCCTTATCATTCTTCGTACAAGAATTATACACAAATACC<br/> ACCACCACACCACCAGAAATTTTACACGTGTTTTCTAAAT<br/> TATTACTTTCCGTGGCCAATCAAATTGAAATTTTTCTTGTT<br/> GAAACGGCAGTGCCTCAACATTATAGTAGCAAGTATTGC<br/> CTAAAGAGTTTCCGTCTCGTGCCCCCCCCCTATCCCCTTTT<br/> GTAATTTGCCAAAATAGCTCAAAAAGGATAATCCCGCACTT<br/> TTTTTTCCGAGTTCTCGTCATGCAAGCAAGCTTATTCAGA<br/> ATTTTCAGAGGTGCGAGTCTCACCCTACCCTGCAGCTG<br/> CATCTTTTACAGCAACAGCAACAGCAGGTGCCACCACGGC<br/> AAAGACATTGTCTGGATCCACTGTGCTCCGAAAACGTATA<br/> AAAGGACCTATTCATCCCTGGTCTTATCTTCTCCAGAATTA<br/> TTTTTTTTTTCATCAGTTTAAACAACAACAACGTTATTGTCAT<br/> ACAACAACAACAACAATACAAACAACAAGAGCTCAAACCG<br/> GGCGTGTGGCGTAGTTGGTAGCGCGTTCCCTTAGCATGG<br/> GAAAGGTCATGAGTTCGACTCTTATCTCGTCCAGGTGAAG<br/> BTAGACCATATGAGTTTTAGAGCTAGAAATAGCAAGTTAAA<br/> ATAAGGCTAGTCCGTTATCAACTTGAAAAAGTGGCACCGA<br/> GTCGGTGCTTTTGGCCGGCATGGTCCCAGCCTCCTCGCT<br/> GGCGCCGGCTGGGCAACATGCTTCGGCATGGCGAATGGG<br/> ACACGCGT</p> | <p>Red: <i>ADH1</i> Promoter;<br/> Green: tRNA<sup>Ala</sup>; Blue:<br/> 20bp gRFP; Purple: Cas9<br/> binding Motif; Orange:<br/> HDV</p> | <p><i>Sall</i>, <i>SacI</i>,<br/> <i>MluI</i></p> |
| <p>PtAgRFPHD<br/>V</p>               |  | <p>gtcgacgctctccctatgcgactcctgcattaggaagcagcccagtagtaggtgagg<br/> ccggtgagcaccgccgcccgaaggaatggtgcatgcaaggagatggcgccaaca<br/> gtccccggccacgggctgccaccatacccacgcccgaacaagcgctcatgag<br/> cccgaagtggcgagcccgatctcccatcggatgctggcgatataggcgccagc<br/> aaccgcacctgtggcgccggtgatccggccacgatgctccggcgtagaggatca<br/> gcgccGATCTcaaacGGCGTGTGGCGTAGTTGGTAGCGC<br/> GTTCCCTTAGCATGGAAAGGTCATGAGTTCGACTCTTAT</p>                                                                                                                                                                                                                                                                                                                                                                                                                                                                                                                                                                                                                                                                                                                                                                                                                                                                                                                                                        | <p>Grey: YPB vector; Green:<br/> tRNA<sup>Ala</sup>; Blue: 20bp<br/> gRFP; Purple: Cas9<br/> binding Motif; Orange:<br/> HDV</p>          | <p><i>Sall</i>, <i>MluI</i></p>                   |

|                                       |          |                                                                                                                                                                                                                                                                                                                                                                                                                                                                                                                                                                                                                                                                                                                                                                                                                                                                                                                                                                                                                                                                                                                                                                                                                                                                                                |                                                                                             |                            |
|---------------------------------------|----------|------------------------------------------------------------------------------------------------------------------------------------------------------------------------------------------------------------------------------------------------------------------------------------------------------------------------------------------------------------------------------------------------------------------------------------------------------------------------------------------------------------------------------------------------------------------------------------------------------------------------------------------------------------------------------------------------------------------------------------------------------------------------------------------------------------------------------------------------------------------------------------------------------------------------------------------------------------------------------------------------------------------------------------------------------------------------------------------------------------------------------------------------------------------------------------------------------------------------------------------------------------------------------------------------|---------------------------------------------------------------------------------------------|----------------------------|
|                                       |          | <p>CTCGTCCAGGTGAAGGTAGACCATATGAGTTTTAGAGCTA<br/> GAAATAGCAAGTTAAAATAAGGCTAGTCCGTTATCAACTTG<br/> AAAAAGTGGCACCAGTCGGTGCCTTTGGCCGGCATGGT<br/> CCCAGCCTCCTCGCTGGCGCCGGCTGGGCAACATGCTTC<br/> GGCATGGCGAATGGGACACGCGT</p>                                                                                                                                                                                                                                                                                                                                                                                                                                                                                                                                                                                                                                                                                                                                                                                                                                                                                                                                                                                                                                                                           |                                                                                             |                            |
| P <sub>SNR52</sub> gRFP               | 984/1002 | <p>gtcgacAAGTGATTAGACTTAGTCCGTTCAAATCAAGCACAA<br/> CTCTGTTCAATTGTTTCAACAAGAATTAATTCAAAAACAGGTT<br/> CGGTGCATAATTTGCAAAAAAATATTGCAGCTTCTGTGGCT<br/> CGAACACAGTACCTCCAGATTTTCAGGTTTGAATACTTCAG<br/> TCTGACGCTCTCCAGATGAGCTAAAGCTGCAATAAGAAA<br/> ACCCACGCCGGATTGCAACCCGGAATCCTTTGATTAGAA<br/> GTCAAAAGCGATAACCATTTGCCACGCAGGCCTACTTGA<br/> TGGGTTTGTAATGGTCTACTTTTTTCAGACCTAACAGAAAT<br/> TTAATGAAAGTCATATTCTTATACAATAAACTGTGTCATA<br/> AAAGCAGATATTCGACTTTCTAGATTATATAGGACCCAAG<br/> AACTAAAATTTAATGCCATATTATGCATTTTTAATCTGTA<br/> AGTGTGTTTCCAACCTATCACAAGTACGTTCTTGTA<br/> GTGTTTGTAGGGTTGCAAAATGAATCATAACAACATCTCAAC<br/> AGAACATGTATAGCAAAGCTTAGTATAAAATCAGTGT<br/> AGAGGCAATCCAAGAATGTTTACATCAAAGTTTCAATAAAT<br/> ATCGACCGAAACTGAAAATCTTTTTAGGTTATTGTTCACTTT<br/> TTTGTAATATTTAAACATTTTTGGACCTAAAAAATA<br/> ACACCAATTACGTACCAAGAAGCATCTAATCAACTCCCAGA<br/> TCACCACTATACATTTAAAAGTCATTGGTCAATAACTATACT<br/> CGAGTATTGCCTCATCAAAGAAACAATCAAATATTATAGAT<br/> ACTCACTCCATCACGTGATAATTTCACTGGTATGGAAAAGT<br/> GGAAAATTTTATAAAAAAATTTGATGCCTTTGGCATAGC<br/> TGAAACTTCGGCCCAATAGGATTGGAGAATATGTTTTCGCA<br/> GCGTTCTTACAATTAATTGTGGTGGAAAGTTCGAGACTTGC<br/> GTAAACTATTTTTAATTTgGTGAAGGTAGACCATATGAgtttag<br/> agctagaaatagcAagttaaaataaggctagccgttatcaactgaaaaagtgga<br/> ccgagtcggtgctttacgct</p> | <p>Red: SNR52 Promoter;<br/> Blue: 20bp gRFP; Purple:<br/> Cas9 binding motif</p>           | Sall, MluI                 |
| P <sub>ADH1A</sub> "SapI cassette"HDV |          | <p>GTGACATGTCAAAGGATTCAACGGTTGAGATGGAGCCGT<br/> CAAATATCCAAAACACTCTTCTTTCAACTAATTTGCCGTAAA<br/> CTATCTCCATCGTACGATTAAGATAAAAAAACAATTATT</p>                                                                                                                                                                                                                                                                                                                                                                                                                                                                                                                                                                                                                                                                                                                                                                                                                                                                                                                                                                                                                                                                                                                                                    | <p>Red:ADH1 Promoter;<br/> Green tRNA<sup>Ala</sup> ; Blue:<br/> SapI Cassette; Purple:</p> | Sall, SacI,<br>SapI, ClaI, |

|                           |                |                                                                                                                                                                                                                                                                                                                                                                                                                                                                                                                                                                                                                                                                                                                                                                                                                                                                                                                                                                                                                                                                                                                                                                                                               |                                             |                                            |
|---------------------------|----------------|---------------------------------------------------------------------------------------------------------------------------------------------------------------------------------------------------------------------------------------------------------------------------------------------------------------------------------------------------------------------------------------------------------------------------------------------------------------------------------------------------------------------------------------------------------------------------------------------------------------------------------------------------------------------------------------------------------------------------------------------------------------------------------------------------------------------------------------------------------------------------------------------------------------------------------------------------------------------------------------------------------------------------------------------------------------------------------------------------------------------------------------------------------------------------------------------------------------|---------------------------------------------|--------------------------------------------|
|                           |                | <p>CTTACAATATTTGATAGAGACCCAATGCAAAGCCAGCGAG<br/> AAAGAGGAGTATTGGCATTGTTGGGTAGTAGATGAATGAG<br/> TAATCTTCTAGCCAAAACAAAATAAACCAAGAAGCAGTAG<br/> GCAAAACTGAGTACTTGATAGCGCTTGTAGTCTTTGTATTT<br/> AAAAAACCTAATTGTCCAAAATTGAAAATCATGAGTTGC<br/> AAATTTGTTGAAATCACCAGGTAAATAGATCATTTAGCTATA<br/> TCGCCTTATCATTCTTCGTACAAGAATTATACACAAATACC<br/> ACCACCACACCACCAGAAATTTTACACGTGTTTTCTAAAT<br/> TATTACTTTCCGTGGCCAATCAAATTGAAATTTTCTTGTT<br/> GAAACGGCAGTGCCTCAACATTATAGTAGCAAGTATTGC<br/> CTAAAGAGTTTCCGTCTCGTGCCCCCCCCCTATCCCCTTTT<br/> GTAATTTGCCAAAATAGCTCAAAAAGGATAATCCCGCACTT<br/> TTTTTTCCGAGTTCTCGTCATGCAAGCAAGCTTATTCAGA<br/> ATTTTCAGAGGTGCGAGTCTCACCCTACCCTGCAGCTG<br/> CATCTTTTACAGCAACAGCAACAGCAGGTGCCACCACGGC<br/> AAAGACATTGTCTGGATCCACTGTGCTCCGAAAACGTATA<br/> AAAGGACCTATTCATCCCTGGTCTTATCTTCTCCAGAATTA<br/> TTTTTTTTTTCATCAGTTTAAACAACAACAAACGTTATTGTCAT<br/> ACAACAACAACAACAATACAAACAACAAGAGCTCAAAACG<br/> GGCGTGTGGCGTAGTTGGTAGCGGTTCCCTTAGCATGG<br/> GAAAGGTCATGAGTTCGACTCTTATCTCGTCCAGGAAGAG<br/> CATCGATGCTCTTCCGTTTTAGAGCTAGAAATAGCAAGTTA<br/> AAATAAGGCTAGTCCGTTATCAACTTGAAAAAGTGGCACC<br/> GAGTCGGTGTCTTTGGCCGGCATGGTCCCAGCCTCCTCG<br/> CTGGCGCCGGCTGGGCAACATGCTTCGGCATGGCGAATG<br/> GGAC</p> | <p>Cas9 binding Motif;<br/> Orange: HDV</p> | <p><i>SapI</i>,</p>                        |
| <p>P<sub>ADH</sub>RFP</p> | <p>701/629</p> | <p>GTGCTCGGTACCGTCGACATGTCAAAGGATTCAACGGTTG<br/> AGATGGAGCCGTCAAATATCCAAAACACTCTTCTTTCAACT<br/> AATTTGCCGTAAACTATCTCCATCGTACGATTAAGATAAAA<br/> AAAAACAATTATTTCTTACAATATTTGATAGAGACCCAATGC<br/> AAAGCCAGCGAGAAAGAGGAGTATTGGCATTGTTGGGTAG<br/> TAGATGAATGAGTAATCTTCTAGCCAAAACAAAATAAACCA<br/> CAAGAACAGTAGGCAAACTGAGTACTTGATAGCGCTTGT<br/> AGTCTTTGTATTTAAAAAACCTAATTGTCCAAAATTGAAA<br/> ATCATGAGTTGCAAATTTGTTGAAATCACCAGGTAAATAGA<br/> TCATTTAGCTATATCGCCTTATCATTCTTCGTACAAGAATTA</p>                                                                                                                                                                                                                                                                                                                                                                                                                                                                                                                                                                                                                                                                                                                          |                                             | <p><i>KpnI, BglII,</i><br/><i>MluI</i></p> |

|                                       |         |                                                                                                                                                                                                                                                                                                                                                                                                                                                                                                                                                                                                                                                                                                                                                                                                                                                                                                                                                                                                                                                                                                                                                                                                                                                                                                                                                                                        |  |                             |
|---------------------------------------|---------|----------------------------------------------------------------------------------------------------------------------------------------------------------------------------------------------------------------------------------------------------------------------------------------------------------------------------------------------------------------------------------------------------------------------------------------------------------------------------------------------------------------------------------------------------------------------------------------------------------------------------------------------------------------------------------------------------------------------------------------------------------------------------------------------------------------------------------------------------------------------------------------------------------------------------------------------------------------------------------------------------------------------------------------------------------------------------------------------------------------------------------------------------------------------------------------------------------------------------------------------------------------------------------------------------------------------------------------------------------------------------------------|--|-----------------------------|
|                                       |         | <p>TACACAAATACCACCACCACACCACCCAGAAATTTTACACG<br/> TGTTTTCTAAATTACTTTCCGTGGCCAATCAAATTGAAA<br/> TTTTTCTTGTTCGAAACGGCAGTGCCTCAAACATTATAGTA<br/> GCAAGTATTGCCTAAAGAGTTTCCGTCTCGTGCCCCCCCC<br/> CTATCCCCTTTTGTAAATTTGCCAAAATAGCTCAAAAAGGAT<br/> AATCCCGCACTTTTTTTTTCCGAGTTCTCGTCATGCAAGCA<br/> AGCTTATTCAGAATTTTCAGAGGTGCGAGTCTCACCCTAC<br/> CACTGCAGCTGCATCTTTTACAGCAACAGCAACAGCAGGT<br/> GCCACCACGGCAAAGACATTGTCTGGATCCACTGTGCTCC<br/> GAAAAGTGTATAAAAGGACCTATTCATCCCTGGTCTTATCT<br/> TCTCCAGAATTATTTTTTTTTTTCATCAGTTTAACAACAACAAA<br/> CGTTATTGTCATACAACAACAACAATAACAAAAACAAT<br/> Tagatctatggtttcaaaaggtgaagaagataatggctattataaagaattatgag<br/> atftaaagttcatatggaaggttcagttaatggctatgaattgaaattgaaggtgaaggt<br/> gaaggtagaccatatgaaggtactcaaactgctaaattgaaagttactaaaggtggtc<br/> cattaccattgctgggatattttgcaccacaattatgtatggttcaaaagcttatgttaa<br/> acatccagctgatattccagattatttaaattgtcattccagaaggtttaaatgggaaa<br/> gagttatgaatttgaagatgggtggtgttactgttactcaagattcatcattacaagatg<br/> gtgaattattataaagttaaattgagaggtactaatttccatcagatggtccagttatgc<br/> aaaaaaaaactatgggtgggaagcttcatcagaaagaatgatccagaagatgggtg<br/> ctftaaaggtgaaattaaacaaagattgaaattaaaagatgggtggtcattatgatgctg<br/> aagttaaaactactataaagctaaaaaccagttcaattaccaggtgcttataatgta<br/> atattaaattggatattacttcacataatgaagattatactattgttgaacaatatgaaaga<br/> gctgaaggttagacattcaactgggtgatggatgaattatataaataaACGCGT</p> |  |                             |
| P <sub>ADH</sub> RFP<br>"Full Length" | 920/629 | <p>GCTTATTCAGAATTTTTCAGAGGTGCGAGTCTCACCCTACC<br/> ACTGCAGCTGCATCTTTTACAGCAACAGCAACAGCAGGTG<br/> CCACCACGGCAAAGACATTGTCTGGATCCACTGTGCTCCG<br/> AAAAGTGTATAAAAGGACCTATTCATCCCTGGTCTTATCTT<br/> CTCCAGAATTATTTTTTTTTTTCATCAGTTTAACAACAACAAC<br/> GTTATTGTCATACAACAACAACAATAACAAAAACAATTa<br/> gatctatggtttcaaaaggtgaagaagataatggctattataaagaattatgagatt<br/> taaagttcatatggaaggttcagttaatggctatgaattgaaattgaaggtgaaggtga<br/> aggttagaccatatgaaggtactcaaactgctaaattgaaagttactaaaggtggtccat<br/> taccattgctgggatattttgcaccacaattatgtatggttcaaaagcttatgttaaaca<br/> tccagctgatattccagattatttaaattgtcattccagaaggtttaaatgggaaaga<br/> gttatgaatttgaagatgggtggtgttactgttactcaagattcatcattacaagatggt</p>                                                                                                                                                                                                                                                                                                                                                                                                                                                                                                                                                                                                                                                                                        |  | <i>Bam</i> HI, <i>Mlu</i> I |

|                                  |         |                                                                                                                                                                                                                                                                                                                                                                                                                                                                                                                                                                                                                                                           |                                                    |  |
|----------------------------------|---------|-----------------------------------------------------------------------------------------------------------------------------------------------------------------------------------------------------------------------------------------------------------------------------------------------------------------------------------------------------------------------------------------------------------------------------------------------------------------------------------------------------------------------------------------------------------------------------------------------------------------------------------------------------------|----------------------------------------------------|--|
|                                  |         | gaattattataaagttaaattgagaggtactaatttccatcagatggtccagttatgca<br>aaaaaaaaactatgggtgggaagcttcatcagaaagaatgtatccagaagatggtg<br>ttaaaaggtaaaataaacaagattgaaataaaagatggtggcattatgatgctg<br>aagtaaaactactataaagctaaaaaccagttcaattaccaggtgcttataatgta<br>atattaaattggatattacttcacataatgaagattatactattgttgaacaatatgaaaga<br>gctgaaggtagacattcaactggtggtatggatgaattatataaataaACGCGT                                                                                                                                                                                                                                                                                 |                                                    |  |
| RFP fusion<br>fragment-top       | 920/954 | GCTTATTCAGAATTTTCAGAGGTGCGAGTCTCACCACTACC<br>ACTGCAGCTGCATCTTTTACAGCAACAGCAACAGCAGGTG<br>CCACCACGGCAAAGACATTGTCTGGATCCACTGTGCTCCG<br>AAAAGTGTATAAAAGGACCTATTCATCCCTGGTCTTATCTT<br>CTCCAGAATTATTTTTTTTTCATCAGTTTAACAACAACAAC<br>GTTATTGTCATACAACAACAACAATAACAAAAACAATTa<br>gatctatggtttcaaaaggtaagaagataatggcCCATCAGATGGTCCA<br>GTT                                                                                                                                                                                                                                                                                                                        | Red: sequence homology<br>between oligonucleotides |  |
| RFP fusion<br>fragment<br>bottom | 953/629 | GGCCCTACGCGTtatttatataattcatccataaccaccagttgaatgtctacctc<br>agctcttcatattgttcaacaatagataatcttcattatgtaagtaataccaatttaatat<br>taacattataagcacctgtaattgaactggttttagctttataagtagtttaactcagc<br>atcataatgaccacatcttttaattcaatcttgttaattcaccttttaagcaccatctc<br>tgatacattcttctgatgaagctccaaccatagttttttgcataactggaccatct<br>gatgg                                                                                                                                                                                                                                                                                                                              | Red: sequence homology<br>between oligonucleotides |  |
| RFP Healing<br>Fragment          | 920/954 | GCTTATTCAGAATTTTCAGAGGTGCGAGTCTCACCACTACC<br>ACTGCAGCTGCATCTTTTACAGCAACAGCAACAGCAGGTG<br>CCACCACGGCAAAGACATTGTCTGGATCCACTGTGCTCCG<br>AAAAGTGTATAAAAGGACCTATTCATCCCTGGTCTTATCTT<br>CTCCAGAATTATTTTTTTTTCATCAGTTTAACAACAACAAC<br>GTTATTGTCATACAACAACAACAATAACAAAAACAATTa<br>gatctatggtttcaaaaggtaagaagataatggccatcagatggtccagttatgc<br>aaaaaaaaactatgggtgggaagcttcatcagaaagaatgtatccagaagatggtg<br>ctttaaaggtaaaataaacaagattgaaataaaagatggtggcattatgatgctg<br>aagtaaaactactataaagctaaaaaccagttcaattaccaggtgcttataatgta<br>atattaaattggatattacttcacataatgaagattatactattgttgaacaatatgaaaga<br>gctgaaggtagacattcaactggtggtatggatgaattatataaataaACGCGTA<br>GGCC | Red: sequence homology<br>between oligonucleotides |  |

|                                  |         |                                                                                                             |                                                           |              |
|----------------------------------|---------|-------------------------------------------------------------------------------------------------------------|-----------------------------------------------------------|--------------|
| <i>LEU2</i> healing oligo- top   | 976     | ACTGTCTTGCCTGGTGACCATGTCGGTACCGAAATTGTCA<br>ATGAAGCgaattcCTGTTGA                                            | Purple, Red: homologous sequence. Blue- <i>EcoRI</i> site |              |
| <i>LEU2</i> healing oligo-bottom | 977     | AGCCATAAATGCTGCCATACGAGTGATACGAGTAACTTCG<br>TCAACAGgaattcGCTTCAT                                            | Purple, Red: homologous sequence. Blue- <i>EcoRI</i> site | <i>EcoRI</i> |
| <i>LEU2</i> healing fragment     | 976+977 | ACTGTCTTGCCTGGTGACCATGTCGGTACCGAAATTGTCA<br>ATGAAGCGAATTCCTGTTGACGAAGTTACTCGTATCACTCG<br>TATGGCAGCATTATGGCT | Blue- <i>EcoRI</i> site                                   | <i>EcoRI</i> |
